# Supplementary material for: Impact of health insurance coverage for Helicobacter pylori gastritis on the trends in eradication therapy in Japan: retrospective observational study and simulation study based on real-world data
Source: PubMed Central journal article supplement (PMC5642792; doi:10.1136/bmjopen-2017-015855), 2017-07-31
Supplement: bmjopen-2017-015855supp001.pdf [file bmjopen-2017-015855supp001.pdf]

## Supplementary appendix

Table S1. The number of primary eradication individuals, mean age, and percentage of males for each year in the JMDC and MDV databases.

|      |          | 2005  | 2006  | 2007  | 2008   | 2009   | 2010   | 2011   | 2012   | 2013   | 2014   | 2015   |
|------|----------|-------|-------|-------|--------|--------|--------|--------|--------|--------|--------|--------|
| JMDC | Number   | 1,001 | 987   | 1,049 | 1,426  | 2,078  | 3,231  | 3,985  | 4,649  | 19,341 | 21,951 | 21,421 |
|      | Mean age | 41.5  | 41.1  | 40.4  | 39.2   | 38.4   | 37.7   | 38.4   | 38.3   | 35.8   | 37.1   | 35.9   |
|      | (SD)     | (9.7) | (9.8) | (9.8) | (10.6) | (10.8) | (10.7) | (10.8) | (10.6) | (10.2) | (10.4) | (10.4) |
|      | Male %   | 83    | 79    | 77    | 70     | 67     | 66     | 65     | 65     | 58     | 80     | 58     |
| MDV  | Number   | -     | -     | -     | 442    | 2,108  | 5,655  | 7,520  | 9,588  | 36,811 | 52,920 | 55,949 |
|      | Mean age | -     | -     | -     | 58.1   | 57.9   | 59.0   | 59.0   | 59.3   | 60.6   | 60.9   | 61.0   |
|      | (SD)     | -     | -     | -     | (14.3) | (13.7) | (14.1) | (14.1) | (13.8) | (12.6) | (12.7) | (12.9) |
|      | Male %   | -     | -     | -     | 65     | 66     | 64     | 64     | 64     | 57     | 55     | 55     |

JMDC, Japan Medical Data Center; MDV, Medical Data Vision; SD, standard deviation.

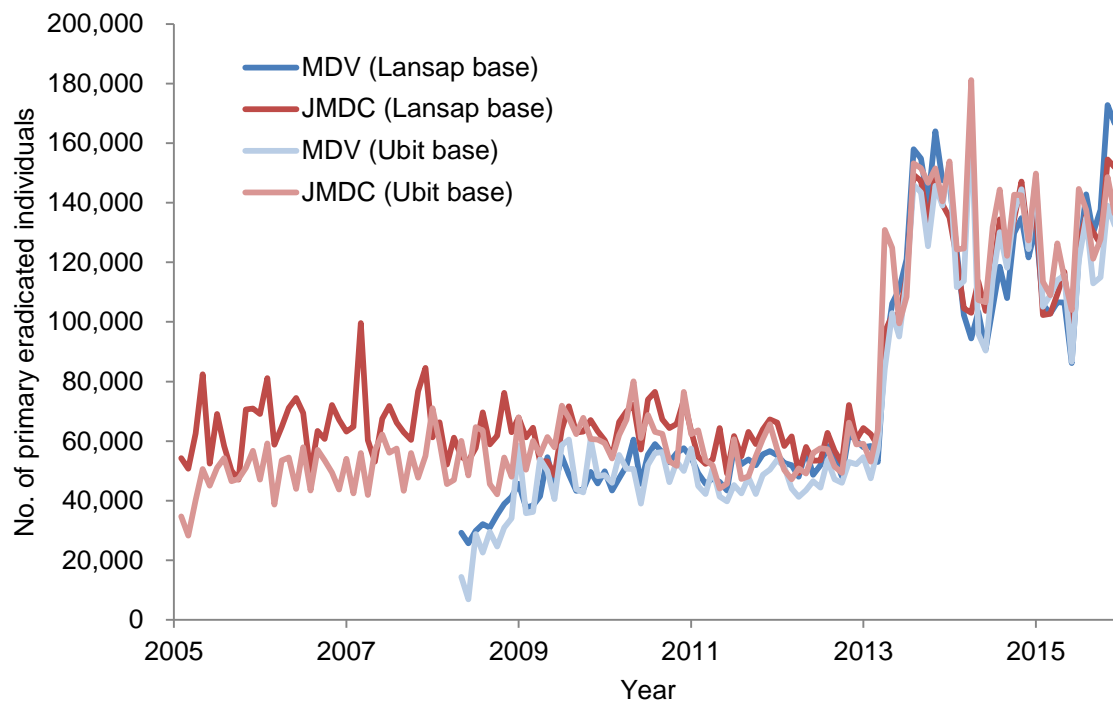

Figure S1. The number of individuals with the primary eradication of *H. pylori* according to each database.
